# Supplementary material
Source: PubMed Central journal article supplement (PMC4011652)
Supplement: chest_145_5_1032_ds01.pdf [file chest_145_5_1032_ds01.pdf]

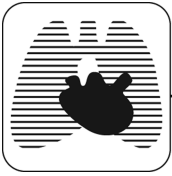

### Prevalence, Treatment, and Outcomes Associated With OSA Among Patients Hospitalized With Pneumonia

*Peter K. Lindenauer, MD; Mihaela S. Stefan, MD; Karin G. Johnson, MD; Aruna Priya, MA, MSc; Penelope S. Pekow, PhD; and Michael B. Rothberg, MD, MPH*

e-Table 1. List of charge codes used to identify mechanical ventilation and vasopressors

| Noninvasive Mechanical Ventilation | Invasive Mechanical Ventilation | Vasopressors   |
|------------------------------------|---------------------------------|----------------|
| CIRCUIT CPAP/BIPAP                 | CIRCUIT VENTILATOR              | DOPAMINE       |
| MASK CPAP                          | TUBING VENTILATOR               | EPINEPHRINE    |
| BIPAP SETUP                        | VENTILATOR HI FREQUENCY SETUP   | VASOPRESSIN    |
| CPAP SETUP                         | VENTILATOR SETUP                | NOREPINEPHRINE |
| PILLOW BIPAP VENT L                | VENTILATOR PRESSURE SETUP       | PHENYLEPHRINE  |
| PILLOW BIPAP VENT M                | VENTILATOR PER DAY              |                |
| PILLOW BIPAP VENT S                | VENTILATOR FIRST DAY            |                |
| MASK BIPAP                         | VENTILATOR INITIAL SHIFT        |                |
| BIPAP INITIAL SHIFT                | VENTILATOR SUBSEQUENT DAY       |                |
| BIPAP PER HR                       | VENTILATOR HI FREQUENCY PER HR  |                |
| BIPAP PER SHIFT                    | VENTILATOR 3 HR                 |                |
| BIPAP/CPAP CHECK                   | VENTILATOR PER SHIFT            |                |
| CPAP INITIAL SHIFT                 | VENTILATOR PER HR               |                |
| CPAP PER DAY                       | PF VENTILATOR FIRST DAY         |                |
| CPAP TREATMENT                     | PF VENTILATOR SUBSEQUENT DAY    |                |
| CPAP W/AEROSOL PER SHIFT           |                                 |                |
| CPAP PER SHIFT                     |                                 |                |
| CPAP INITIATION/MANAGEMENT         |                                 |                |
| CPAP 3 HR                          |                                 |                |
| CPAP PER HR                        |                                 |                |

*Online supplements are not copyedited prior to posting.*



e-Table 2. Full model output from mortality regression model

| Parameter                                   | Estimate | Standard Error | 95% Confidence Limits |       | Z      | Pr >  Z |
|---------------------------------------------|----------|----------------|-----------------------|-------|--------|---------|
| Intercept                                   | -2.18    | 0.05           | -2.28                 | -2.08 | -43.09 | <.0001  |
| Sleep apnea                                 | -0.10    | 0.04           | -0.18                 | -0.03 | -2.62  | 0.0088  |
| HCAP                                        | 0.64     | 0.02           | 0.60                  | 0.67  | 38.66  | <.0001  |
| CAP                                         | Referent |                |                       |       |        |         |
| <i>Age group</i>                            |          |                |                       |       |        |         |
| 18 - 24 years                               | -1.93    | 0.13           | -2.18                 | -1.67 | -14.79 | <.0001  |
| 25 - 34 years                               | -1.69    | 0.09           | -1.85                 | -1.52 | -19.78 | <.0001  |
| 35 - 44 years                               | -1.25    | 0.06           | -1.37                 | -1.14 | -21.97 | <.0001  |
| 45 - 54 years                               | -0.95    | 0.04           | -1.03                 | -0.88 | -24.02 | <.0001  |
| 55 - 64 years                               | -0.58    | 0.03           | -0.64                 | -0.52 | -18.30 | <.0001  |
| 65 - 74 years                               | -0.40    | 0.02           | -0.45                 | -0.35 | -16.14 | <.0001  |
| 75 - 84 years                               | -0.18    | 0.02           | -0.22                 | -0.14 | -8.40  | <.0001  |
| 85+ years                                   | Referent |                |                       |       |        |         |
| <i>Gender</i>                               |          |                |                       |       |        |         |
| Male                                        | 0.09     | 0.02           | 0.06                  | 0.13  | 5.71   | <.0001  |
| Female                                      | Referent |                |                       |       |        |         |
| <i>Marital status</i>                       |          |                |                       |       |        |         |
| Single                                      | 0.03     | 0.02           | 0.00                  | 0.07  | 1.86   | 0.0633  |
| Other/Missing                               | 0.12     | 0.04           | 0.05                  | 0.19  | 3.22   | 0.0013  |
| Married                                     | Referent |                |                       |       |        |         |
| <i>Insurance payor</i>                      |          |                |                       |       |        |         |
| Medicaid                                    | 0.16     | 0.04           | 0.09                  | 0.23  | 4.33   | <.0001  |
| Managed care                                | -0.11    | 0.03           | -0.17                 | -0.04 | -3.34  | 0.0008  |
| Commercial-Indemnity                        | -0.04    | 0.05           | -0.14                 | 0.05  | -0.86  | 0.3872  |
| Other                                       | 0.04     | 0.04           | -0.04                 | 0.13  | 0.95   | 0.3403  |
| Medicare                                    | Referent |                |                       |       |        |         |
| <i>Admitting physician specialty</i>        |          |                |                       |       |        |         |
| Critical Care Medicine - Pulmonary diseases | 0.68     | 0.03           | 0.62                  | 0.75  | 20.13  | <.0001  |
| Family Practice                             |          |                |                       |       |        |         |
| Internal and Geriatric medicine             | -0.09    | 0.03           | -0.16                 | -0.03 | -2.94  | 0.0032  |
| Hospitalist                                 | -0.15    | 0.03           | -0.20                 | -0.10 | -5.76  | <.0001  |
| Other specialty                             | -0.17    | 0.03           | -0.23                 | -0.10 | -5.01  | <.0001  |
|                                             | Referent |                |                       |       |        |         |

Online supplements are not copyedited prior to posting.



### Comorbidity

|                                |       |      |       |       |        |        |
|--------------------------------|-------|------|-------|-------|--------|--------|
| Congestive heart failure       | 0.31  | 0.02 | 0.26  | 0.35  | 14.51  | <.0001 |
| Valvular disease               | -0.31 | 0.03 | -0.37 | -0.24 | -9.13  | <.0001 |
| Pulmonary circulation disease  | 0.28  | 0.03 | 0.22  | 0.35  | 8.34   | <.0001 |
| Peripheral vascular disease    | 0.06  | 0.03 | 0.00  | 0.13  | 1.92   | 0.0544 |
| Hypertension                   | -0.70 | 0.02 | -0.74 | -0.66 | -36.67 | <.0001 |
| Paralysis                      | 0.18  | 0.05 | 0.09  | 0.27  | 3.90   | <.0001 |
| Chronic pulmonary disease      | -0.22 | 0.02 | -0.25 | -0.19 | -13.47 | <.0001 |
| Diabetes                       | -0.22 | 0.02 | -0.27 | -0.18 | -10.29 | <.0001 |
| Hypothyroidism                 | -0.24 | 0.03 | -0.30 | -0.19 | -8.83  | <.0001 |
| Liver disease                  | 0.59  | 0.05 | 0.49  | 0.69  | 11.72  | <.0001 |
| Lymphoma                       | 0.06  | 0.06 | -0.07 | 0.18  | 0.90   | 0.3676 |
| Metastatic cancer              | 1.01  | 0.04 | 0.94  | 1.08  | 28.65  | <.0001 |
| Solid tumor without metastasis | 0.34  | 0.04 | 0.26  | 0.43  | 8.30   | <.0001 |
| Arthritis                      | -0.19 | 0.05 | -0.28 | -0.09 | -3.69  | 0.0002 |
| Obesity                        | -0.14 | 0.04 | -0.22 | -0.06 | -3.54  | 0.0004 |
| Weight loss                    | 0.72  | 0.03 | 0.67  | 0.78  | 27.80  | <.0001 |
| Deficiency anemias             | -0.20 | 0.02 | -0.25 | -0.16 | -9.86  | <.0001 |
| Drug abuse                     | -0.52 | 0.09 | -0.70 | -0.34 | -5.59  | <.0001 |
| Psychoses                      | -0.31 | 0.05 | -0.41 | -0.21 | -6.10  | <.0001 |
| Depression                     | -0.36 | 0.03 | -0.42 | -0.30 | -11.46 | <.0001 |
| Renal failure                  | 0.33  | 0.02 | 0.29  | 0.38  | 13.58  | <.0001 |
| Atrial fibrillation            | 0.38  | 0.02 | 0.34  | 0.41  | 20.37  | <.0001 |

### Hospital bed size

|              |          |      |       |       |       |        |
|--------------|----------|------|-------|-------|-------|--------|
| ≤200 beds    | -0.15    | 0.05 | -0.24 | -0.06 | -3.33 | 0.0009 |
| 201-400 beds | 0.04     | 0.04 | -0.03 | 0.12  | 1.15  | 0.2504 |
| ≥401 beds    | Referent |      |       |       |       |        |

### Hospital region

|           |          |      |       |       |       |        |
|-----------|----------|------|-------|-------|-------|--------|
| Northeast | 0.08     | 0.04 | 0.00  | 0.17  | 1.91  | 0.0567 |
| Midwest   | -0.17    | 0.04 | -0.25 | -0.09 | -4.11 | <.0001 |
| West      | -0.03    | 0.04 | -0.12 | 0.05  | -0.70 | 0.484  |
| South     | Referent |      |       |       |       |        |

### Hospital teaching status

|              |          |      |      |      |      |        |
|--------------|----------|------|------|------|------|--------|
| Teaching     | 0.13     | 0.04 | 0.05 | 0.20 | 3.40 | 0.0007 |
| Non-teaching | Referent |      |      |      |      |        |

AUROC = 0.74



e-Table 3. Full model output from late intubation regression model

| Parameter                                   | Estimate | Standard Error | 95% Confidence Limits |       | Z      | Pr >  Z |
|---------------------------------------------|----------|----------------|-----------------------|-------|--------|---------|
| Intercept                                   | -3.53    | 0.06           | -3.65                 | -3.41 | -56.40 | <.0001  |
| Sleep apnea                                 | 0.52     | 0.04           | 0.44                  | 0.60  | 13.07  | <.0001  |
| HCAP                                        | 0.30     | 0.02           | 0.25                  | 0.34  | 12.78  | <.0001  |
| CAP                                         | Referent |                |                       |       |        |         |
| <i>Age groups</i>                           |          |                |                       |       |        |         |
| 18 - 24 years                               | 0.16     | 0.12           | -0.07                 | 0.39  | 1.35   | 0.18    |
| 25 - 34 years                               | 0.38     | 0.08           | 0.23                  | 0.54  | 4.80   | <.0001  |
| 35 - 44 years                               | 0.48     | 0.07           | 0.35                  | 0.61  | 7.35   | <.0001  |
| 45 - 54 years                               | 0.79     | 0.05           | 0.69                  | 0.89  | 15.20  | <.0001  |
| 55 - 64 years                               | 0.81     | 0.05           | 0.72                  | 0.90  | 17.21  | <.0001  |
| 65 - 74 years                               | 0.71     | 0.04           | 0.63                  | 0.79  | 17.40  | <.0001  |
| 75 - 84 years                               | 0.51     | 0.04           | 0.43                  | 0.58  | 13.19  | <.0001  |
| 85+ years                                   | Referent |                |                       |       |        |         |
| <i>Insurance payor</i>                      |          |                |                       |       |        |         |
| Medicaid                                    | 0.05     | 0.05           | -0.04                 | 0.14  | 1.16   | 0.25    |
| Managed care                                | -0.14    | 0.04           | -0.22                 | -0.07 | -3.69  | 0.00    |
| Commercial-Indemnity                        | 0.02     | 0.06           | -0.10                 | 0.13  | 0.28   | 0.78    |
| Other                                       | -0.19    | 0.05           | -0.30                 | -0.09 | -3.64  | 0.00    |
| Medicare                                    | Referent |                |                       |       |        |         |
| <i>Admitting physician specialty</i>        |          |                |                       |       |        |         |
| Critical Care Medicine - Pulmonary diseases | 0.50     | 0.05           | 0.41                  | 0.60  | 10.17  | <.0001  |
| Family Practice                             |          |                |                       |       |        |         |
| Internal and Geriatric medicine             | -0.13    | 0.04           | -0.22                 | -0.05 | -2.99  | 0.0028  |
| Hospitalist                                 | -0.12    | 0.04           | -0.19                 | -0.04 | -3.15  | 0.0016  |
| Other specialty                             | -0.14    | 0.05           | -0.23                 | -0.05 | -3.02  | 0.0025  |
|                                             | Referent |                |                       |       |        |         |
| <i>Comorbidity</i>                          |          |                |                       |       |        |         |
| Congestive heart failure                    | 0.23     | 0.03           | 0.17                  | 0.29  | 7.30   | <.0001  |
| Pulmonary circulation disease               | 0.35     | 0.05           | 0.26                  | 0.44  | 7.81   | <.0001  |
| Hypertension                                | -0.83    | 0.03           | -0.88                 | -0.77 | -29.46 | <.0001  |
| Paralysis                                   | 0.21     | 0.07           | 0.08                  | 0.34  | 3.17   | 0.00    |
| Neurological disorders                      | -0.34    | 0.04           | -0.42                 | -0.25 | -7.72  | <.0001  |
| Chronic pulmonary disease                   | -0.02    | 0.02           | -0.06                 | 0.02  | -0.90  | 0.37    |
| Diabetes                                    | -0.20    | 0.03           | -0.26                 | -0.14 | -6.56  | <.0001  |
| Hypothyroidism                              | -0.39    | 0.04           | -0.47                 | -0.31 | -9.21  | <.0001  |
| Liver disease                               | 0.34     | 0.07           | 0.21                  | 0.46  | 5.14   | <.0001  |
| Solid tumor without metastasis              | -0.27    | 0.07           | -0.41                 | -0.13 | -3.87  | 0.00    |
| Arthritis                                   | -0.25    | 0.07           | -0.38                 | -0.12 | -3.65  | 0.00    |
| Weight loss                                 | 1.08     | 0.04           | 1.01                  | 1.15  | 30.57  | <.0001  |

Online supplements are not copyedited prior to posting.

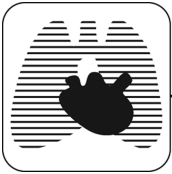

---

|                                    |          |      |       |       |       |        |
|------------------------------------|----------|------|-------|-------|-------|--------|
| Blood loss                         | 0.48     | 0.11 | 0.27  | 0.70  | 4.40  | <.0001 |
| Deficiency anemias                 | 0.00     | 0.03 | -0.06 | 0.05  | -0.14 | 0.89   |
| Psychoses                          | -0.16    | 0.06 | -0.28 | -0.04 | -2.60 | 0.01   |
| Depression                         | -0.42    | 0.04 | -0.51 | -0.34 | -9.60 | <.0001 |
| Renal failure                      | 0.30     | 0.04 | 0.23  | 0.37  | 8.19  | <.0001 |
| Atrial fibrillation                | 0.49     | 0.03 | 0.43  | 0.54  | 17.43 | <.0001 |
| <i>Hospital bedsize</i>            |          |      |       |       |       |        |
| ≤200 beds                          | -0.34    | 0.06 | -0.46 | -0.22 | -5.49 | <.0001 |
| 201-400 beds                       | 0.04     | 0.05 | -0.06 | 0.13  | 0.77  | 0.44   |
| ≥401 beds                          | Referent |      |       |       |       |        |
| <i>Hospital urban/rural status</i> |          |      |       |       |       |        |
| Rural                              | -0.35    | 0.07 | -0.48 | -0.22 | -5.13 | <.0001 |
| Urban                              | Referent |      |       |       |       |        |

---

AUROC = 0.71
